# Supplementary material for: Comparison of dust optical depth from multi-sensor products and MONARCH (Multiscale Online Non-hydrostatic AtmospheRe CHemistry) dust reanalysis over North Africa, the Middle East, and Europe
Source: Copernicus journal article supplement (doi:10.5194/acp-23-5487-2023), 2023-05-17
Supplement: Supplementary file 1 [file acp-23-5487-2023-supplement.pdf]

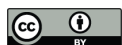

*Supplement of*

**Comparison of dust optical depth from multi-sensor products and MONARCH (Multiscale Online Non-hydrostatic Atmosphere Chemistry) dust reanalysis over North Africa, the Middle East, and Europe**

**Michail Mytilinaios et al.**

*Correspondence to:* Michail Mytilinaios ([michalis.mytilinaios@imaa.cnr.it](mailto:michalis.mytilinaios@imaa.cnr.it))

The copyright of individual parts of the supplement might differ from the article licence.

|        | MONARCH<br>DOD | MIDAS<br>DOD | MB    | RMSE | FGE  | CC   | N x10 <sup>7</sup> |     |
|--------|----------------|--------------|-------|------|------|------|--------------------|-----|
| NorAfr | 0.29 ± 0.27    | 0.25 ± 0.25  | 0.04  | 0.16 | 0.43 | 0.84 | 19.79              | ANN |
|        | 0.22 ± 0.25    | 0.18 ± 0.22  | 0.03  | 0.14 | 0.49 | 0.85 | 5.12               | DJF |
|        | 0.34 ± 0.34    | 0.32 ± 0.31  | 0.02  | 0.19 | 0.42 | 0.84 | 4.82               | MAM |
|        | 0.39 ± 0.27    | 0.31 ± 0.25  | 0.08  | 0.18 | 0.42 | 0.81 | 4.93               | JJA |
|        | 0.22 ± 0.17    | 0.2 ± 0.18   | 0.01  | 0.11 | 0.39 | 0.81 | 4.93               | SON |
| SubSah | 0.2 ± 0.28     | 0.19 ± 0.29  | 0.01  | 0.17 | 1.61 | 0.83 | 4.88               | ANN |
|        | 0.19 ± 0.27    | 0.18 ± 0.28  | 0.01  | 0.16 | 2.34 | 0.82 | 2.43               | DJF |
|        | 0.3 ± 0.4      | 0.29 ± 0.39  | 0.01  | 0.2  | 0.85 | 0.87 | 1.05               | MAM |
|        | 0.18 ± 0.19    | 0.2 ± 0.22   | -0.02 | 0.17 | 0.75 | 0.67 | 0.44               | JJA |
|        | 0.12 ± 0.12    | 0.1 ± 0.14   | 0.02  | 0.12 | 0.97 | 0.6  | 0.97               | SON |
| MidEas | 0.23 ± 0.22    | 0.24 ± 0.23  | -0.01 | 0.15 | 0.43 | 0.79 | 11.17              | ANN |
|        | 0.15 ± 0.15    | 0.15 ± 0.15  | -0.01 | 0.09 | 0.44 | 0.81 | 2.74               | DJF |
|        | 0.29 ± 0.26    | 0.32 ± 0.29  | -0.03 | 0.18 | 0.41 | 0.79 | 2.52               | MAM |
|        | 0.33 ± 0.26    | 0.32 ± 0.27  | 0     | 0.2  | 0.47 | 0.72 | 2.93               | JJA |
|        | 0.16 ± 0.12    | 0.18 ± 0.13  | -0.01 | 0.1  | 0.41 | 0.73 | 2.98               | SON |
| WesAsi | 0.12 ± 0.14    | 0.14 ± 0.16  | -0.02 | 0.12 | 1    | 0.66 | 7.81               | ANN |
|        | 0.07 ± 0.09    | 0.09 ± 0.1   | -0.01 | 0.07 | 0.66 | 0.69 | 0.99               | DJF |
|        | 0.14 ± 0.14    | 0.17 ± 0.17  | -0.03 | 0.14 | 1.43 | 0.66 | 1.61               | MAM |
|        | 0.15 ± 0.16    | 0.18 ± 0.18  | -0.03 | 0.15 | 0.93 | 0.63 | 2.77               | JJA |
|        | 0.09 ± 0.1     | 0.11 ± 0.11  | -0.02 | 0.09 | 0.93 | 0.64 | 2.43               | SON |
| TroAtl | 0.14 ± 0.2     | 0.18 ± 0.26  | -0.04 | 0.16 | 1    | 0.8  | 4.45               | ANN |
|        | 0.15 ± 0.2     | 0.18 ± 0.26  | -0.03 | 0.17 | 0.96 | 0.76 | 1.35               | DJF |
|        | 0.15 ± 0.22    | 0.21 ± 0.28  | -0.06 | 0.17 | 1.03 | 0.83 | 1.1                | MAM |
|        | 0.17 ± 0.23    | 0.21 ± 0.29  | -0.04 | 0.18 | 0.93 | 0.81 | 1.03               | JJA |
|        | 0.08 ± 0.13    | 0.11 ± 0.17  | -0.03 | 0.1  | 1.09 | 0.79 | 0.98               | SON |
| AraSea | 0.08 ± 0.12    | 0.12 ± 0.16  | -0.04 | 0.1  | 0.76 | 0.79 | 3.63               | ANN |
|        | 0.04 ± 0.06    | 0.06 ± 0.07  | -0.02 | 0.05 | 0.81 | 0.73 | 1.13               | DJF |
|        | 0.08 ± 0.11    | 0.14 ± 0.15  | -0.05 | 0.12 | 0.84 | 0.75 | 1.07               | MAM |
|        | 0.19 ± 0.19    | 0.25 ± 0.26  | -0.06 | 0.18 | 0.55 | 0.75 | 0.56               | JJA |
|        | 0.05 ± 0.06    | 0.08 ± 0.09  | -0.03 | 0.06 | 0.75 | 0.78 | 0.87               | SON |
| MedSea | 0.06 ± 0.12    | 0.07 ± 0.13  | 0     | 0.09 | 1.28 | 0.75 | 5.57               | ANN |
|        | 0.05 ± 0.12    | 0.05 ± 0.13  | 0     | 0.09 | 1.31 | 0.76 | 1.01               | DJF |
|        | 0.08 ± 0.15    | 0.09 ± 0.18  | -0.01 | 0.12 | 1.21 | 0.75 | 1.22               | MAM |
|        | 0.07 ± 0.1     | 0.07 ± 0.1   | 0     | 0.07 | 1.05 | 0.74 | 1.9                | JJA |
|        | 0.05 ± 0.09    | 0.05 ± 0.09  | 0     | 0.06 | 1.63 | 0.75 | 1.44               | SON |
| NorAtl | 0 ± 0.03       | 0.02 ± 0.04  | -0.02 | 0.03 | 1.88 | 0.71 | 4.93               | ANN |
|        | 0.01 ± 0.03    | 0.01 ± 0.04  | -0.01 | 0.03 | 1.84 | 0.71 | 0.84               | DJF |
|        | 0 ± 0.03       | 0.03 ± 0.04  | -0.03 | 0.04 | 1.86 | 0.73 | 1.42               | MAM |
|        | 0.01 ± 0.03    | 0.02 ± 0.05  | -0.01 | 0.04 | 1.88 | 0.73 | 1.36               | JJA |
|        | 0 ± 0.02       | 0.01 ± 0.02  | -0.01 | 0.02 | 1.92 | 0.68 | 1.31               | SON |
| NorEur | 0.01 ± 0.03    | 0.02 ± 0.03  | -0.01 | 0.03 | 1.93 | 0.61 | 3.3                | ANN |
|        | 0 ± 0.01       | 0.01 ± 0.02  | -0.01 | 0.01 | 2.2  | 0.69 | 0.14               | DJF |
|        | 0.01 ± 0.04    | 0.03 ± 0.04  | -0.02 | 0.04 | 2.08 | 0.58 | 1.08               | MAM |
|        | 0.01 ± 0.04    | 0.02 ± 0.03  | -0.01 | 0.03 | 1.7  | 0.67 | 1.36               | JJA |
|        | 0.01 ± 0.02    | 0.01 ± 0.02  | -0.01 | 0.02 | 2.1  | 0.68 | 0.71               | SON |
| Russia | 0.02 ± 0.05    | 0.03 ± 0.03  | 0     | 0.04 | 2.62 | 0.49 | 2.09               | ANN |
|        | 0.01 ± 0.02    | 0.01 ± 0.01  | 0     | 0.02 | 2.91 | 0.39 | 0                  | DJF |
|        | 0.03 ± 0.06    | 0.04 ± 0.05  | -0.01 | 0.05 | 3.2  | 0.55 | 0.54               | MAM |
|        | 0.02 ± 0.05    | 0.02 ± 0.03  | 0     | 0.04 | 2.27 | 0.44 | 1.19               | JJA |
|        | 0.03 ± 0.04    | 0.02 ± 0.02  | 0.01  | 0.03 | 2.93 | 0.53 | 0.35               | SON |

**Figure S1.** Regional DOD skill scores (mean ± standard deviation, MB, RMSE, FGE and CC) for the MONARCH reanalysis considering MIDAS as a reference, averaged over the study period 2007–2016 on annual basis (ANN) and by season (DJF, MAM, JJA and SON), along with the corresponding regional number of samples N. The full name of the acronym for each sub-region is given in Fig. 1. The color scale of each metric is based on the color-bars shown if Fig. 6 and Fig. 7.

|        | MONARCH<br>DOD | MISR<br>DOD | MB    | RMSE | FGE  | CC    | N x10 <sup>5</sup> |     |
|--------|----------------|-------------|-------|------|------|-------|--------------------|-----|
| NorAfr | 0.07 ± 0.13    | 0.09 ± 0.14 | -0.02 | 0.11 | 1.39 | 0.71  | 0.82               | ANN |
|        | 0.05 ± 0.1     | 0.06 ± 0.08 | -0.02 | 0.1  | 1.57 | 0.48  | 0.19               | DJF |
|        | 0.06 ± 0.12    | 0.09 ± 0.13 | -0.03 | 0.1  | 1.48 | 0.72  | 0.2                | MAM |
|        | 0.13 ± 0.18    | 0.14 ± 0.21 | -0.01 | 0.13 | 1.15 | 0.78  | 0.22               | JJA |
|        | 0.04 ± 0.07    | 0.08 ± 0.08 | -0.04 | 0.09 | 1.4  | 0.48  | 0.21               | SON |
| SubSah | 0.14 ± 0.21    | 0.19 ± 0.19 | -0.06 | 0.15 | 1    | 0.75  | 0.54               | ANN |
|        | 0.15 ± 0.21    | 0.21 ± 0.19 | -0.06 | 0.16 | 0.94 | 0.73  | 0.17               | DJF |
|        | 0.14 ± 0.23    | 0.19 ± 0.19 | -0.05 | 0.16 | 0.96 | 0.75  | 0.14               | MAM |
|        | 0.2 ± 0.25     | 0.28 ± 0.21 | -0.08 | 0.18 | 0.99 | 0.77  | 0.1                | JJA |
|        | 0.06 ± 0.08    | 0.11 ± 0.1  | -0.04 | 0.09 | 1.13 | 0.63  | 0.13               | SON |
| MidEas | 0.19 ± 0.18    | 0.2 ± 0.21  | -0.01 | 0.15 | 0.71 | 0.73  | 2.15               | ANN |
|        | 0.12 ± 0.12    | 0.11 ± 0.12 | 0     | 0.11 | 0.85 | 0.57  | 0.49               | DJF |
|        | 0.2 ± 0.18     | 0.21 ± 0.2  | -0.01 | 0.14 | 0.68 | 0.71  | 0.56               | MAM |
|        | 0.33 ± 0.22    | 0.35 ± 0.26 | -0.02 | 0.2  | 0.55 | 0.66  | 0.55               | JJA |
|        | 0.12 ± 0.09    | 0.13 ± 0.11 | 0     | 0.1  | 0.77 | 0.53  | 0.56               | SON |
| WesAsi | 0.07 ± 0.12    | 0.09 ± 0.12 | -0.02 | 0.1  | 1.15 | 0.63  | 0.51               | ANN |
|        | 0.05 ± 0.09    | 0.05 ± 0.08 | 0     | 0.09 | 1.41 | 0.42  | 0.1                | DJF |
|        | 0.09 ± 0.14    | 0.12 ± 0.14 | -0.03 | 0.11 | 1.05 | 0.7   | 0.12               | MAM |
|        | 0.08 ± 0.13    | 0.1 ± 0.14  | -0.02 | 0.11 | 1.04 | 0.66  | 0.16               | JJA |
|        | 0.06 ± 0.09    | 0.08 ± 0.09 | -0.02 | 0.09 | 1.18 | 0.49  | 0.14               | SON |
| TroAtl | 0.12 ± 0.17    | 0.16 ± 0.19 | -0.05 | 0.14 | 1.19 | 0.74  | 8.46               | ANN |
|        | 0.13 ± 0.18    | 0.17 ± 0.17 | -0.04 | 0.15 | 1.15 | 0.64  | 2.12               | DJF |
|        | 0.13 ± 0.19    | 0.18 ± 0.2  | -0.05 | 0.15 | 1.16 | 0.76  | 2.25               | MAM |
|        | 0.14 ± 0.19    | 0.2 ± 0.22  | -0.06 | 0.15 | 1.18 | 0.78  | 2.08               | JJA |
|        | 0.06 ± 0.1     | 0.11 ± 0.13 | -0.05 | 0.11 | 1.29 | 0.7   | 2.01               | SON |
| AraSea | 0.07 ± 0.11    | 0.11 ± 0.14 | -0.05 | 0.11 | 1.15 | 0.71  | 6.51               | ANN |
|        | 0.03 ± 0.05    | 0.06 ± 0.07 | -0.03 | 0.08 | 1.32 | 0.44  | 1.84               | DJF |
|        | 0.07 ± 0.1     | 0.11 ± 0.12 | -0.04 | 0.1  | 1.12 | 0.65  | 1.9                | MAM |
|        | 0.17 ± 0.17    | 0.27 ± 0.2  | -0.1  | 0.19 | 0.82 | 0.67  | 1.13               | JJA |
|        | 0.04 ± 0.05    | 0.07 ± 0.09 | -0.03 | 0.08 | 1.21 | 0.53  | 1.64               | SON |
| MedSea | 0.06 ± 0.12    | 0.07 ± 0.1  | -0.01 | 0.09 | 1.32 | 0.68  | 5.47               | ANN |
|        | 0.04 ± 0.11    | 0.05 ± 0.09 | -0.01 | 0.09 | 1.61 | 0.55  | 1.05               | DJF |
|        | 0.08 ± 0.16    | 0.1 ± 0.13  | -0.02 | 0.11 | 1.22 | 0.75  | 1.31               | MAM |
|        | 0.06 ± 0.1     | 0.06 ± 0.1  | 0     | 0.07 | 1.26 | 0.72  | 1.78               | JJA |
|        | 0.05 ± 0.09    | 0.07 ± 0.09 | -0.02 | 0.09 | 1.27 | 0.57  | 1.33               | SON |
| NorAtl | 0 ± 0.02       | 0.06 ± 0.08 | -0.06 | 0.1  | 1.92 | 0.21  | 8.83               | ANN |
|        | 0 ± 0.03       | 0.05 ± 0.08 | -0.04 | 0.09 | 1.94 | 0.18  | 1.47               | DJF |
|        | 0 ± 0.02       | 0.09 ± 0.09 | -0.08 | 0.12 | 1.92 | 0.19  | 2.68               | MAM |
|        | 0.01 ± 0.03    | 0.06 ± 0.08 | -0.05 | 0.09 | 1.9  | 0.31  | 2.37               | JJA |
|        | 0 ± 0.01       | 0.05 ± 0.08 | -0.05 | 0.09 | 1.94 | 0.13  | 2.31               | SON |
| NorEur | 0 ± 0.02       | 0.06 ± 0.08 | -0.06 | 0.1  | 1.9  | 0.11  | 1.28               | ANN |
|        | 0 ± 0.01       | 0.03 ± 0.06 | -0.03 | 0.07 | 1.93 | 0.09  | 0.07               | DJF |
|        | 0 ± 0.02       | 0.07 ± 0.09 | -0.07 | 0.11 | 1.88 | 0.12  | 0.49               | MAM |
|        | 0 ± 0.02       | 0.07 ± 0.07 | -0.06 | 0.1  | 1.9  | 0.08  | 0.44               | JJA |
|        | 0 ± 0.01       | 0.04 ± 0.07 | -0.03 | 0.08 | 1.94 | 0.1   | 0.28               | SON |
| Russia | 0 ± 0.01       | 0.05 ± 0.08 | -0.05 | 0.09 | 1.9  | 0.11  | 0.14               | ANN |
|        | 0 ± 0          | 0.02 ± 0.03 | -0.02 | 0.03 | 1.98 | -0.13 | 0                  | DJF |
|        | 0 ± 0.01       | 0.06 ± 0.09 | -0.05 | 0.1  | 1.91 | 0.1   | 0.05               | MAM |
|        | 0 ± 0.01       | 0.06 ± 0.07 | -0.06 | 0.09 | 1.88 | 0.12  | 0.06               | JJA |
|        | 0 ± 0          | 0.03 ± 0.07 | -0.03 | 0.08 | 1.93 | -0.01 | 0.03               | SON |

Figure S2. Same as in Fig. S1 but for the comparison between the MONARCH reanalysis and MISR mean regional DOD.

|        | MONARCH<br>DOD | AERONET<br>DOD | MB    | RMSE | FGE  | CC   | N x10 <sup>4</sup> |     |
|--------|----------------|----------------|-------|------|------|------|--------------------|-----|
| NorAfr | 0.3 ± 0.33     | 0.36 ± 0.33    | -0.06 | 0.24 | 0.64 | 0.75 | 5.76               | ANN |
|        | 0.25 ± 0.35    | 0.27 ± 0.31    | -0.02 | 0.23 | 0.75 | 0.76 | 1.31               | DJF |
|        | 0.4 ± 0.44     | 0.48 ± 0.41    | -0.08 | 0.29 | 0.62 | 0.78 | 1.62               | MAM |
|        | 0.31 ± 0.23    | 0.39 ± 0.27    | -0.08 | 0.23 | 0.57 | 0.66 | 1.47               | JJA |
|        | 0.21 ± 0.19    | 0.27 ± 0.23    | -0.06 | 0.19 | 0.63 | 0.68 | 1.36               | SON |
| SubSah | 0.43 ± 0.45    | 0.7 ± 0.54     | -0.28 | 0.46 | 0.85 | 0.74 | 0.51               | ANN |
|        | 0.55 ± 0.43    | 1 ± 0.58       | -0.45 | 0.62 | 0.87 | 0.68 | 0.2                | DJF |
|        | 0.5 ± 0.54     | 0.7 ± 0.43     | -0.21 | 0.39 | 0.6  | 0.78 | 0.17               | MAM |
|        | 0.12 ± 0.13    | 0.21 ± 0.21    | -0.09 | 0.16 | 1.24 | 0.79 | 0.06               | JJA |
|        | 0.21 ± 0.17    | 0.38 ± 0.28    | -0.17 | 0.27 | 1.01 | 0.67 | 0.08               | SON |
| MidEas | 0.24 ± 0.21    | 0.29 ± 0.28    | -0.05 | 0.2  | 0.88 | 0.74 | 4.79               | ANN |
|        | 0.15 ± 0.14    | 0.15 ± 0.19    | 0     | 0.13 | 1.11 | 0.7  | 0.87               | DJF |
|        | 0.29 ± 0.22    | 0.37 ± 0.28    | -0.08 | 0.21 | 0.56 | 0.74 | 1.43               | MAM |
|        | 0.29 ± 0.23    | 0.36 ± 0.32    | -0.07 | 0.24 | 0.88 | 0.68 | 1.44               | JJA |
|        | 0.16 ± 0.12    | 0.19 ± 0.22    | -0.02 | 0.16 | 1.12 | 0.7  | 1.04               | SON |
| WesAsi | 0.06 ± 0.07    | 0.19 ± 0.21    | -0.13 | 0.22 | 1.4  | 0.64 | 0.67               | ANN |
|        | 0.02 ± 0.03    | 0.02 ± 0.07    | 0     | 0.06 | 1.87 | 0.43 | 0.1                | DJF |
|        | 0.07 ± 0.06    | 0.16 ± 0.16    | -0.09 | 0.15 | 1.2  | 0.66 | 0.14               | MAM |
|        | 0.07 ± 0.07    | 0.28 ± 0.24    | -0.21 | 0.29 | 1.32 | 0.6  | 0.25               | JJA |
|        | 0.06 ± 0.07    | 0.18 ± 0.19    | -0.12 | 0.19 | 1.41 | 0.7  | 0.18               | SON |
| TroAtl | 0.2 ± 0.22     | 0.3 ± 0.27     | -0.1  | 0.18 | 0.82 | 0.83 | 2.63               | ANN |
|        | 0.18 ± 0.2     | 0.24 ± 0.24    | -0.06 | 0.16 | 0.82 | 0.78 | 0.59               | DJF |
|        | 0.22 ± 0.27    | 0.33 ± 0.29    | -0.11 | 0.18 | 0.87 | 0.87 | 0.72               | MAM |
|        | 0.26 ± 0.21    | 0.36 ± 0.3     | -0.11 | 0.2  | 0.63 | 0.83 | 0.76               | JJA |
|        | 0.12 ± 0.13    | 0.23 ± 0.2     | -0.11 | 0.17 | 1.01 | 0.78 | 0.56               | SON |
| AraSea | 0.16 ± 0.17    | 0.39 ± 0.29    | -0.23 | 0.31 | 1.11 | 0.67 | 0.43               | ANN |
|        | 0.11 ± 0.09    | 0.18 ± 0.21    | -0.07 | 0.17 | 1.3  | 0.71 | 0.09               | DJF |
|        | 0.18 ± 0.12    | 0.44 ± 0.19    | -0.26 | 0.3  | 0.88 | 0.63 | 0.18               | MAM |
|        | 0.24 ± 0.32    | 0.66 ± 0.36    | -0.42 | 0.49 | 1.12 | 0.72 | 0.07               | JJA |
|        | 0.12 ± 0.11    | 0.32 ± 0.26    | -0.21 | 0.29 | 1.35 | 0.65 | 0.09               | SON |
| MedSea | 0.03 ± 0.08    | 0.05 ± 0.12    | -0.01 | 0.08 | 1.8  | 0.73 | 20.53              | ANN |
|        | 0.02 ± 0.06    | 0.03 ± 0.08    | -0.01 | 0.06 | 1.89 | 0.59 | 2.98               | DJF |
|        | 0.04 ± 0.11    | 0.06 ± 0.14    | -0.02 | 0.1  | 1.76 | 0.73 | 4.81               | MAM |
|        | 0.04 ± 0.08    | 0.05 ± 0.12    | -0.01 | 0.08 | 1.79 | 0.76 | 7.99               | JJA |
|        | 0.03 ± 0.06    | 0.04 ± 0.1     | -0.01 | 0.07 | 1.81 | 0.72 | 4.75               | SON |
| NorAtl | 0.02 ± 0.05    | 0.05 ± 0.1     | -0.03 | 0.08 | 1.84 | 0.69 | 2.5                | ANN |
|        | 0.01 ± 0.03    | 0.05 ± 0.08    | -0.04 | 0.08 | 1.91 | 0.45 | 0.37               | DJF |
|        | 0.02 ± 0.05    | 0.07 ± 0.11    | -0.05 | 0.1  | 1.85 | 0.67 | 0.58               | MAM |
|        | 0.03 ± 0.07    | 0.06 ± 0.12    | -0.03 | 0.09 | 1.77 | 0.76 | 0.94               | JJA |
|        | 0.01 ± 0.03    | 0.04 ± 0.08    | -0.03 | 0.07 | 1.89 | 0.63 | 0.61               | SON |
| NorEur | 0.01 ± 0.03    | 0.02 ± 0.07    | -0.01 | 0.06 | 1.97 | 0.36 | 14.86              | ANN |
|        | 0 ± 0.01       | 0.03 ± 0.08    | -0.02 | 0.08 | 1.98 | 0.18 | 1.23               | DJF |
|        | 0.01 ± 0.04    | 0.03 ± 0.09    | -0.01 | 0.08 | 1.96 | 0.43 | 4.14               | MAM |
|        | 0.01 ± 0.03    | 0.01 ± 0.05    | 0     | 0.05 | 1.98 | 0.34 | 6.56               | JJA |
|        | 0.01 ± 0.02    | 0.02 ± 0.06    | -0.01 | 0.06 | 1.97 | 0.35 | 2.94               | SON |
| Russia | 0.01 ± 0.03    | 0.02 ± 0.08    | 0     | 0.08 | 1.97 | 0.27 | 1.14               | ANN |
|        | 0.01 ± 0.02    | 0.03 ± 0.08    | -0.02 | 0.08 | 1.93 | 0.44 | 0.05               | DJF |
|        | 0.02 ± 0.04    | 0.03 ± 0.1     | -0.01 | 0.09 | 1.94 | 0.43 | 0.33               | MAM |
|        | 0.01 ± 0.03    | 0.01 ± 0.06    | 0.01  | 0.06 | 1.99 | 0.15 | 0.62               | JJA |
|        | 0.01 ± 0.02    | 0.02 ± 0.09    | -0.01 | 0.09 | 1.99 | 0.03 | 0.14               | SON |

Figure S3. Same as in Fig. S1 but for the comparison between MONARCH and AERONET mean regional DOD.

|        | MONARCH<br>DOD | MIDAS+MISR<br>DOD | MB    | RMSE | FGE  | CC   | N x10 <sup>7</sup> |     |
|--------|----------------|-------------------|-------|------|------|------|--------------------|-----|
| NorAfr | 0.29 ± 0.27    | 0.25 ± 0.25       | 0.04  | 0.16 | 0.43 | 0.84 | 19.8               | ANN |
|        | 0.22 ± 0.25    | 0.18 ± 0.22       | 0.03  | 0.14 | 0.49 | 0.85 | 5.12               | DJF |
|        | 0.34 ± 0.34    | 0.32 ± 0.31       | 0.02  | 0.19 | 0.42 | 0.84 | 4.82               | MAM |
|        | 0.39 ± 0.27    | 0.31 ± 0.25       | 0.08  | 0.18 | 0.42 | 0.81 | 4.93               | JJA |
|        | 0.22 ± 0.17    | 0.2 ± 0.18        | 0.01  | 0.11 | 0.39 | 0.81 | 4.93               | SON |
| SubSah | 0.2 ± 0.28     | 0.19 ± 0.29       | 0.01  | 0.17 | 1.6  | 0.83 | 4.89               | ANN |
|        | 0.19 ± 0.27    | 0.18 ± 0.28       | 0.01  | 0.16 | 2.33 | 0.82 | 2.43               | DJF |
|        | 0.3 ± 0.4      | 0.29 ± 0.39       | 0.01  | 0.2  | 0.85 | 0.87 | 1.05               | MAM |
|        | 0.18 ± 0.19    | 0.2 ± 0.22        | -0.02 | 0.17 | 0.75 | 0.67 | 0.44               | JJA |
|        | 0.12 ± 0.12    | 0.1 ± 0.14        | 0.02  | 0.12 | 0.97 | 0.6  | 0.97               | SON |
| MidEas | 0.23 ± 0.22    | 0.24 ± 0.23       | -0.01 | 0.15 | 0.43 | 0.79 | 11.19              | ANN |
|        | 0.15 ± 0.15    | 0.15 ± 0.15       | -0.01 | 0.09 | 0.44 | 0.81 | 2.74               | DJF |
|        | 0.29 ± 0.26    | 0.32 ± 0.29       | -0.03 | 0.18 | 0.41 | 0.79 | 2.53               | MAM |
|        | 0.33 ± 0.26    | 0.32 ± 0.27       | 0     | 0.2  | 0.47 | 0.72 | 2.93               | JJA |
|        | 0.16 ± 0.12    | 0.18 ± 0.13       | -0.01 | 0.1  | 0.41 | 0.73 | 2.99               | SON |
| WesAsi | 0.12 ± 0.14    | 0.14 ± 0.16       | -0.02 | 0.12 | 1    | 0.66 | 7.81               | ANN |
|        | 0.07 ± 0.09    | 0.09 ± 0.1        | -0.01 | 0.07 | 0.66 | 0.69 | 0.99               | DJF |
|        | 0.14 ± 0.14    | 0.17 ± 0.17       | -0.03 | 0.14 | 1.43 | 0.66 | 1.61               | MAM |
|        | 0.15 ± 0.16    | 0.18 ± 0.18       | -0.03 | 0.15 | 0.93 | 0.63 | 2.77               | JJA |
|        | 0.09 ± 0.1     | 0.11 ± 0.11       | -0.02 | 0.09 | 0.93 | 0.64 | 2.44               | SON |
| TroAtl | 0.14 ± 0.2     | 0.18 ± 0.26       | -0.04 | 0.16 | 1    | 0.8  | 4.54               | ANN |
|        | 0.15 ± 0.2     | 0.18 ± 0.25       | -0.03 | 0.17 | 0.96 | 0.76 | 1.37               | DJF |
|        | 0.15 ± 0.22    | 0.21 ± 0.28       | -0.06 | 0.17 | 1.03 | 0.82 | 1.12               | MAM |
|        | 0.17 ± 0.22    | 0.21 ± 0.29       | -0.04 | 0.17 | 0.93 | 0.81 | 1.05               | JJA |
|        | 0.08 ± 0.13    | 0.11 ± 0.17       | -0.03 | 0.1  | 1.09 | 0.79 | 1                  | SON |
| AraSea | 0.08 ± 0.12    | 0.12 ± 0.16       | -0.04 | 0.1  | 0.77 | 0.79 | 3.7                | ANN |
|        | 0.04 ± 0.06    | 0.06 ± 0.07       | -0.02 | 0.05 | 0.81 | 0.72 | 1.15               | DJF |
|        | 0.08 ± 0.11    | 0.14 ± 0.15       | -0.05 | 0.12 | 0.85 | 0.75 | 1.09               | MAM |
|        | 0.19 ± 0.19    | 0.25 ± 0.26       | -0.07 | 0.18 | 0.56 | 0.75 | 0.57               | JJA |
|        | 0.05 ± 0.06    | 0.08 ± 0.09       | -0.03 | 0.06 | 0.76 | 0.77 | 0.89               | SON |
| MedSea | 0.06 ± 0.12    | 0.07 ± 0.13       | 0     | 0.09 | 1.28 | 0.75 | 5.63               | ANN |
|        | 0.05 ± 0.12    | 0.05 ± 0.13       | 0     | 0.09 | 1.31 | 0.76 | 1.02               | DJF |
|        | 0.08 ± 0.15    | 0.09 ± 0.18       | -0.01 | 0.12 | 1.21 | 0.75 | 1.24               | MAM |
|        | 0.07 ± 0.1     | 0.07 ± 0.1        | 0     | 0.07 | 1.05 | 0.74 | 1.92               | JJA |
|        | 0.05 ± 0.09    | 0.05 ± 0.09       | 0     | 0.06 | 1.63 | 0.75 | 1.45               | SON |
| NorAtl | 0 ± 0.03       | 0.02 ± 0.04       | -0.02 | 0.04 | 1.88 | 0.68 | 5.02               | ANN |
|        | 0.01 ± 0.03    | 0.01 ± 0.04       | -0.01 | 0.03 | 1.84 | 0.67 | 0.86               | DJF |
|        | 0 ± 0.03       | 0.03 ± 0.05       | -0.03 | 0.04 | 1.86 | 0.7  | 1.45               | MAM |
|        | 0.01 ± 0.03    | 0.02 ± 0.05       | -0.01 | 0.04 | 1.88 | 0.71 | 1.38               | JJA |
|        | 0 ± 0.02       | 0.01 ± 0.03       | -0.01 | 0.02 | 1.92 | 0.62 | 1.33               | SON |
| NorEur | 0.01 ± 0.03    | 0.02 ± 0.03       | -0.01 | 0.03 | 1.93 | 0.6  | 3.31               | ANN |
|        | 0 ± 0.01       | 0.01 ± 0.02       | -0.01 | 0.01 | 2.2  | 0.67 | 0.15               | DJF |
|        | 0.01 ± 0.04    | 0.03 ± 0.04       | -0.02 | 0.04 | 2.08 | 0.57 | 1.09               | MAM |
|        | 0.01 ± 0.04    | 0.02 ± 0.03       | -0.01 | 0.03 | 1.7  | 0.66 | 1.36               | JJA |
|        | 0.01 ± 0.02    | 0.01 ± 0.02       | -0.01 | 0.02 | 2.1  | 0.66 | 0.72               | SON |
| Russia | 0.02 ± 0.05    | 0.03 ± 0.03       | 0     | 0.04 | 2.62 | 0.49 | 2.09               | ANN |
|        | 0.01 ± 0.02    | 0.01 ± 0.01       | 0     | 0.02 | 2.9  | 0.38 | 0                  | DJF |
|        | 0.03 ± 0.06    | 0.04 ± 0.05       | -0.01 | 0.05 | 3.2  | 0.55 | 0.54               | MAM |
|        | 0.02 ± 0.05    | 0.02 ± 0.03       | 0     | 0.04 | 2.27 | 0.44 | 1.19               | JJA |
|        | 0.03 ± 0.04    | 0.02 ± 0.02       | 0.01  | 0.04 | 2.93 | 0.53 | 0.35               | SON |

Figure S4. Same as in Fig. S1 but for the comparison between the MONARCH reanalysis and MDAS+MISR mean regional DOD.

|        | MONARCH<br>COARSE DOD | MIDAS<br>COARSE DOD | MB    | RMSE | FGE  | CC   | N x10 <sup>7</sup> |     |
|--------|-----------------------|---------------------|-------|------|------|------|--------------------|-----|
| NorAfr | 0.25 ± 0.23           | 0.18 ± 0.18         | 0.06  | 0.14 | 0.5  | 0.83 | 19.79              | ANN |
|        | 0.19 ± 0.21           | 0.13 ± 0.16         | 0.06  | 0.13 | 0.56 | 0.84 | 5.12               | DJF |
|        | 0.29 ± 0.29           | 0.23 ± 0.22         | 0.06  | 0.17 | 0.48 | 0.83 | 4.82               | MAM |
|        | 0.33 ± 0.22           | 0.23 ± 0.18         | 0.1   | 0.17 | 0.51 | 0.8  | 4.93               | JJA |
|        | 0.19 ± 0.15           | 0.15 ± 0.13         | 0.04  | 0.1  | 0.45 | 0.8  | 4.93               | SON |
| SubSah | 0.17 ± 0.24           | 0.13 ± 0.2          | 0.04  | 0.14 | 0.86 | 0.83 | 4.88               | ANN |
|        | 0.16 ± 0.23           | 0.12 ± 0.19         | 0.04  | 0.14 | 0.92 | 0.82 | 2.43               | DJF |
|        | 0.25 ± 0.34           | 0.2 ± 0.28          | 0.05  | 0.18 | 0.79 | 0.87 | 1.05               | MAM |
|        | 0.15 ± 0.16           | 0.14 ± 0.16         | 0.01  | 0.13 | 0.73 | 0.67 | 0.44               | JJA |
|        | 0.1 ± 0.1             | 0.07 ± 0.1          | 0.03  | 0.09 | 0.88 | 0.59 | 0.97               | SON |
| MidEas | 0.2 ± 0.19            | 0.17 ± 0.17         | 0.02  | 0.12 | 0.46 | 0.78 | 11.17              | ANN |
|        | 0.13 ± 0.13           | 0.11 ± 0.11         | 0.02  | 0.08 | 0.46 | 0.81 | 2.74               | DJF |
|        | 0.25 ± 0.22           | 0.23 ± 0.2          | 0.02  | 0.14 | 0.42 | 0.79 | 2.52               | MAM |
|        | 0.28 ± 0.23           | 0.23 ± 0.2          | 0.05  | 0.17 | 0.51 | 0.72 | 2.93               | JJA |
|        | 0.14 ± 0.11           | 0.13 ± 0.1          | 0.01  | 0.08 | 0.42 | 0.73 | 2.98               | SON |
| WesAsi | 0.1 ± 0.12            | 0.1 ± 0.11          | 0     | 0.1  | 0.89 | 0.65 | 7.81               | ANN |
|        | 0.06 ± 0.08           | 0.06 ± 0.07         | 0     | 0.06 | 0.69 | 0.69 | 0.99               | DJF |
|        | 0.12 ± 0.12           | 0.12 ± 0.12         | -0.01 | 0.1  | 0.98 | 0.65 | 1.61               | MAM |
|        | 0.13 ± 0.14           | 0.13 ± 0.13         | 0     | 0.12 | 0.82 | 0.62 | 2.77               | JJA |
|        | 0.08 ± 0.09           | 0.08 ± 0.08         | 0     | 0.07 | 0.99 | 0.63 | 2.43               | SON |
| TroAtl | 0.12 ± 0.17           | 0.13 ± 0.18         | -0.01 | 0.11 | 0.99 | 0.79 | 4.45               | ANN |
|        | 0.13 ± 0.16           | 0.12 ± 0.18         | 0     | 0.12 | 0.97 | 0.75 | 1.35               | DJF |
|        | 0.13 ± 0.19           | 0.15 ± 0.2          | -0.02 | 0.12 | 1.01 | 0.82 | 1.1                | MAM |
|        | 0.14 ± 0.19           | 0.15 ± 0.21         | -0.01 | 0.13 | 0.92 | 0.8  | 1.03               | JJA |
|        | 0.07 ± 0.11           | 0.08 ± 0.12         | -0.01 | 0.08 | 1.06 | 0.78 | 0.98               | SON |
| AraSea | 0.07 ± 0.1            | 0.08 ± 0.11         | -0.02 | 0.07 | 0.73 | 0.79 | 3.63               | ANN |
|        | 0.04 ± 0.05           | 0.04 ± 0.05         | 0     | 0.04 | 0.8  | 0.72 | 1.13               | DJF |
|        | 0.07 ± 0.09           | 0.1 ± 0.11          | -0.03 | 0.08 | 0.8  | 0.75 | 1.07               | MAM |
|        | 0.16 ± 0.16           | 0.18 ± 0.18         | -0.02 | 0.13 | 0.52 | 0.75 | 0.56               | JJA |
|        | 0.04 ± 0.06           | 0.06 ± 0.06         | -0.01 | 0.04 | 0.69 | 0.78 | 0.87               | SON |
| MedSea | 0.05 ± 0.1            | 0.05 ± 0.09         | 0.01  | 0.07 | 1.23 | 0.74 | 5.57               | ANN |
|        | 0.04 ± 0.1            | 0.03 ± 0.1          | 0.01  | 0.07 | 1.31 | 0.75 | 1.01               | DJF |
|        | 0.07 ± 0.13           | 0.07 ± 0.13         | 0     | 0.09 | 1.22 | 0.74 | 1.22               | MAM |
|        | 0.05 ± 0.09           | 0.05 ± 0.07         | 0.01  | 0.06 | 1.02 | 0.73 | 1.9                | JJA |
|        | 0.04 ± 0.07           | 0.04 ± 0.06         | 0.01  | 0.05 | 1.46 | 0.74 | 1.44               | SON |
| NorAtl | 0 ± 0.02              | 0.01 ± 0.03         | -0.01 | 0.02 | 1.9  | 0.71 | 4.93               | ANN |
|        | 0 ± 0.02              | 0.01 ± 0.03         | 0     | 0.02 | 1.84 | 0.7  | 0.84               | DJF |
|        | 0 ± 0.02              | 0.02 ± 0.03         | -0.02 | 0.03 | 1.87 | 0.73 | 1.42               | MAM |
|        | 0.01 ± 0.03           | 0.01 ± 0.03         | -0.01 | 0.02 | 1.91 | 0.73 | 1.36               | JJA |
|        | 0 ± 0.01              | 0.01 ± 0.02         | -0.01 | 0.01 | 1.94 | 0.69 | 1.31               | SON |
| NorEur | 0.01 ± 0.03           | 0.02 ± 0.02         | -0.01 | 0.02 | 2.12 | 0.61 | 3.3                | ANN |
|        | 0 ± 0.01              | 0.01 ± 0.01         | 0     | 0.01 | 1.87 | 0.69 | 0.14               | DJF |
|        | 0.01 ± 0.03           | 0.02 ± 0.03         | -0.01 | 0.03 | 2.31 | 0.58 | 1.08               | MAM |
|        | 0.01 ± 0.03           | 0.02 ± 0.02         | 0     | 0.02 | 1.76 | 0.66 | 1.36               | JJA |
|        | 0.01 ± 0.02           | 0.01 ± 0.01         | 0     | 0.01 | 2.57 | 0.67 | 0.71               | SON |
| Russia | 0.02 ± 0.04           | 0.02 ± 0.02         | 0     | 0.04 | 2.53 | 0.48 | 2.09               | ANN |
|        | 0 ± 0.01              | 0.01 ± 0.01         | 0     | 0.01 | 2.23 | 0.38 | 0                  | DJF |
|        | 0.02 ± 0.05           | 0.02 ± 0.04         | 0     | 0.04 | 3.11 | 0.55 | 0.54               | MAM |
|        | 0.02 ± 0.04           | 0.02 ± 0.02         | 0     | 0.04 | 2.32 | 0.43 | 1.19               | JJA |
|        | 0.02 ± 0.04           | 0.01 ± 0.02         | 0.01  | 0.03 | 2.37 | 0.53 | 0.35               | SON |

Figure S5. Same as in Fig. S1 but for the comparison between the MONARCH reanalysis and MIDAS mean regional coarse DOD.

|        | MONARCH<br>COARSE DOD | AEROIASI<br>COARSE DOD | MB    | RMSE | FGE  | CC    | N x10 <sup>5</sup> |     |
|--------|-----------------------|------------------------|-------|------|------|-------|--------------------|-----|
| NorAfr | 0.22 ± 0.21           | 0.17 ± 0.18            | 0.04  | 0.21 | 0.7  | 0.49  | 14.94              | ANN |
|        | 0.16 ± 0.2            | 0.11 ± 0.09            | 0.05  | 0.2  | 0.77 | 0.35  | 3.97               | DJF |
|        | 0.26 ± 0.26           | 0.19 ± 0.19            | 0.06  | 0.25 | 0.74 | 0.48  | 3.36               | MAM |
|        | 0.3 ± 0.2             | 0.27 ± 0.26            | 0.04  | 0.23 | 0.61 | 0.57  | 3.52               | JJA |
|        | 0.17 ± 0.14           | 0.14 ± 0.12            | 0.02  | 0.15 | 0.67 | 0.35  | 4.08               | SON |
| SubSah | 0.13 ± 0.21           | 0.12 ± 0.08            | 0.01  | 0.19 | 0.85 | 0.42  | 5.62               | ANN |
|        | 0.15 ± 0.22           | 0.11 ± 0.06            | 0.03  | 0.2  | 0.73 | 0.52  | 2.39               | DJF |
|        | 0.18 ± 0.28           | 0.14 ± 0.12            | 0.05  | 0.25 | 0.94 | 0.44  | 1.1                | MAM |
|        | 0.1 ± 0.13            | 0.13 ± 0.11            | -0.03 | 0.13 | 1.02 | 0.48  | 0.71               | JJA |
|        | 0.09 ± 0.1            | 0.1 ± 0.04             | -0.02 | 0.11 | 0.9  | 0.11  | 1.42               | SON |
| MidEas | 0.16 ± 0.16           | 0.19 ± 0.16            | -0.02 | 0.16 | 0.67 | 0.54  | 11.61              | ANN |
|        | 0.1 ± 0.11            | 0.12 ± 0.08            | -0.02 | 0.12 | 0.77 | 0.3   | 3.01               | DJF |
|        | 0.2 ± 0.2             | 0.22 ± 0.2             | -0.02 | 0.18 | 0.64 | 0.58  | 2.67               | MAM |
|        | 0.25 ± 0.2            | 0.26 ± 0.2             | -0.01 | 0.2  | 0.6  | 0.48  | 2.64               | JJA |
|        | 0.12 ± 0.1            | 0.16 ± 0.1             | -0.04 | 0.12 | 0.67 | 0.36  | 3.3                | SON |
| WesAsi | 0.08 ± 0.11           | 0.17 ± 0.12            | -0.09 | 0.16 | 1.08 | 0.37  | 9.44               | ANN |
|        | 0.04 ± 0.06           | 0.13 ± 0.06            | -0.09 | 0.12 | 1.33 | 0.23  | 1.65               | DJF |
|        | 0.09 ± 0.11           | 0.18 ± 0.12            | -0.08 | 0.16 | 1.02 | 0.31  | 1.96               | MAM |
|        | 0.11 ± 0.13           | 0.21 ± 0.15            | -0.1  | 0.18 | 0.98 | 0.36  | 3.02               | JJA |
|        | 0.06 ± 0.08           | 0.15 ± 0.09            | -0.08 | 0.13 | 1.07 | 0.28  | 2.82               | SON |
| TroAtl | 0.09 ± 0.13           | 0.13 ± 0.06            | -0.03 | 0.12 | 1.17 | 0.46  | 6.73               | ANN |
|        | 0.11 ± 0.14           | 0.12 ± 0.04            | -0.01 | 0.13 | 0.98 | 0.36  | 1.71               | DJF |
|        | 0.11 ± 0.15           | 0.13 ± 0.06            | -0.02 | 0.14 | 1.15 | 0.44  | 1.68               | MAM |
|        | 0.1 ± 0.15            | 0.13 ± 0.08            | -0.04 | 0.13 | 1.28 | 0.56  | 1.55               | JJA |
|        | 0.06 ± 0.09           | 0.12 ± 0.04            | -0.06 | 0.1  | 1.28 | 0.48  | 1.8                | SON |
| AraSea | 0.05 ± 0.08           | 0.12 ± 0.05            | -0.07 | 0.1  | 1.21 | 0.46  | 6.61               | ANN |
|        | 0.03 ± 0.05           | 0.12 ± 0.03            | -0.09 | 0.1  | 1.45 | 0.44  | 1.85               | DJF |
|        | 0.06 ± 0.08           | 0.13 ± 0.05            | -0.07 | 0.1  | 1.17 | 0.48  | 1.97               | MAM |
|        | 0.13 ± 0.13           | 0.15 ± 0.09            | -0.02 | 0.13 | 0.72 | 0.4   | 0.91               | JJA |
|        | 0.04 ± 0.05           | 0.12 ± 0.04            | -0.08 | 0.1  | 1.25 | 0.36  | 1.87               | SON |
| MedSea | 0.04 ± 0.08           | 0.11 ± 0.04            | -0.07 | 0.1  | 1.45 | 0.42  | 8.18               | ANN |
|        | 0.03 ± 0.07           | 0.11 ± 0.02            | -0.08 | 0.11 | 1.66 | 0.31  | 1.3                | DJF |
|        | 0.05 ± 0.1            | 0.11 ± 0.04            | -0.06 | 0.11 | 1.42 | 0.42  | 1.81               | MAM |
|        | 0.04 ± 0.07           | 0.12 ± 0.04            | -0.08 | 0.1  | 1.36 | 0.48  | 2.96               | JJA |
|        | 0.03 ± 0.06           | 0.11 ± 0.03            | -0.08 | 0.09 | 1.46 | 0.41  | 2.11               | SON |
| NorAtl | 0 ± 0.02              | 0.11 ± 0.02            | -0.11 | 0.11 | 1.91 | 0.27  | 3.82               | ANN |
|        | 0 ± 0.02              | 0.11 ± 0.02            | -0.11 | 0.11 | 1.93 | 0.12  | 0.58               | DJF |
|        | 0 ± 0.02              | 0.11 ± 0.02            | -0.11 | 0.11 | 1.91 | 0.28  | 0.98               | MAM |
|        | 0.01 ± 0.02           | 0.11 ± 0.02            | -0.11 | 0.11 | 1.89 | 0.37  | 1.27               | JJA |
|        | 0 ± 0.01              | 0.11 ± 0.01            | -0.11 | 0.11 | 1.94 | 0.07  | 0.99               | SON |
| NorEur | 0.01 ± 0.02           | 0.1 ± 0.02             | -0.09 | 0.1  | 1.85 | 0.06  | 7.17               | ANN |
|        | 0 ± 0.01              | 0.12 ± 0.03            | -0.11 | 0.12 | 1.94 | 0.02  | 1                  | DJF |
|        | 0.01 ± 0.02           | 0.1 ± 0.02             | -0.09 | 0.09 | 1.81 | 0.1   | 2.1                | MAM |
|        | 0.01 ± 0.02           | 0.1 ± 0.02             | -0.09 | 0.1  | 1.81 | 0.13  | 2.45               | JJA |
|        | 0 ± 0.01              | 0.1 ± 0.02             | -0.09 | 0.1  | 1.9  | -0.01 | 1.63               | SON |
| Russia | 0.01 ± 0.03           | 0.11 ± 0.04            | -0.1  | 0.11 | 1.74 | 0.04  | 5.89               | ANN |
|        | 0 ± 0.01              | 0.14 ± 0.04            | -0.14 | 0.15 | 1.89 | 0.09  | 1.19               | DJF |
|        | 0.01 ± 0.04           | 0.1 ± 0.03             | -0.08 | 0.1  | 1.68 | 0.15  | 1.61               | MAM |
|        | 0.01 ± 0.04           | 0.1 ± 0.03             | -0.09 | 0.1  | 1.72 | 0.15  | 2.18               | JJA |
|        | 0.01 ± 0.03           | 0.1 ± 0.03             | -0.09 | 0.1  | 1.73 | -0.05 | 0.91               | SON |

Figure S6. Same as in Fig. S1 but for the comparison between the MONARCH reanalysis and AEROIASI mean regional coarse DOD.

|        | MONARCH<br>COARSE DOD | AERONET<br>COARSE DOD | MB    | RMSE | FGE  | CC   | N x10 <sup>4</sup> |     |
|--------|-----------------------|-----------------------|-------|------|------|------|--------------------|-----|
| NorAfr | 0.14 ± 0.16           | 0.16 ± 0.19           | -0.03 | 0.13 | 0.67 | 0.74 | 1.78               | ANN |
|        | 0.07 ± 0.1            | 0.06 ± 0.1            | 0.01  | 0.06 | 0.88 | 0.82 | 0.4                | DJF |
|        | 0.14 ± 0.19           | 0.19 ± 0.21           | -0.05 | 0.15 | 0.69 | 0.75 | 0.45               | MAM |
|        | 0.22 ± 0.18           | 0.26 ± 0.22           | -0.05 | 0.18 | 0.54 | 0.65 | 0.5                | JJA |
|        | 0.1 ± 0.1             | 0.12 ± 0.12           | -0.01 | 0.09 | 0.6  | 0.68 | 0.44               | SON |
| SubSah | 0.28 ± 0.34           | 0.41 ± 0.34           | -0.13 | 0.26 | 0.61 | 0.77 | 0.63               | ANN |
|        | 0.36 ± 0.33           | 0.56 ± 0.36           | -0.19 | 0.31 | 0.56 | 0.76 | 0.25               | DJF |
|        | 0.38 ± 0.46           | 0.49 ± 0.34           | -0.11 | 0.32 | 0.55 | 0.75 | 0.15               | MAM |
|        | 0.08 ± 0.1            | 0.15 ± 0.13           | -0.07 | 0.11 | 0.96 | 0.76 | 0.09               | JJA |
|        | 0.14 ± 0.12           | 0.2 ± 0.15            | -0.06 | 0.13 | 0.57 | 0.67 | 0.13               | SON |
| MidEas | 0.18 ± 0.16           | 0.2 ± 0.19            | -0.02 | 0.13 | 0.54 | 0.73 | 6.07               | ANN |
|        | 0.12 ± 0.11           | 0.11 ± 0.11           | 0.01  | 0.09 | 0.6  | 0.67 | 1.2                | DJF |
|        | 0.22 ± 0.19           | 0.26 ± 0.22           | -0.04 | 0.15 | 0.48 | 0.75 | 1.54               | MAM |
|        | 0.23 ± 0.18           | 0.25 ± 0.22           | -0.02 | 0.17 | 0.59 | 0.68 | 1.75               | JJA |
|        | 0.13 ± 0.1            | 0.14 ± 0.12           | -0.01 | 0.1  | 0.51 | 0.63 | 1.58               | SON |
| WesAsi | 0.05 ± 0.05           | 0.14 ± 0.15           | -0.09 | 0.15 | 0.97 | 0.71 | 0.58               | ANN |
|        | 0.02 ± 0.02           | 0.04 ± 0.05           | -0.02 | 0.05 | 0.84 | 0.44 | 0.08               | DJF |
|        | 0.05 ± 0.04           | 0.11 ± 0.1            | -0.06 | 0.09 | 0.84 | 0.71 | 0.12               | MAM |
|        | 0.06 ± 0.06           | 0.18 ± 0.17           | -0.13 | 0.19 | 1.1  | 0.66 | 0.23               | JJA |
|        | 0.06 ± 0.06           | 0.15 ± 0.15           | -0.09 | 0.14 | 0.93 | 0.79 | 0.15               | SON |
| TroAtl | 0.13 ± 0.17           | 0.18 ± 0.2            | -0.05 | 0.12 | 0.93 | 0.85 | 2.16               | ANN |
|        | 0.12 ± 0.16           | 0.14 ± 0.17           | -0.02 | 0.11 | 0.95 | 0.8  | 0.47               | DJF |
|        | 0.14 ± 0.21           | 0.19 ± 0.22           | -0.06 | 0.12 | 1.05 | 0.89 | 0.55               | MAM |
|        | 0.17 ± 0.17           | 0.23 ± 0.23           | -0.06 | 0.14 | 0.71 | 0.86 | 0.66               | JJA |
|        | 0.07 ± 0.09           | 0.13 ± 0.13           | -0.06 | 0.1  | 1.06 | 0.8  | 0.48               | SON |
| AraSea | 0.11 ± 0.14           | 0.26 ± 0.21           | -0.14 | 0.2  | 0.82 | 0.73 | 0.51               | ANN |
|        | 0.08 ± 0.06           | 0.13 ± 0.1            | -0.06 | 0.09 | 0.63 | 0.69 | 0.15               | DJF |
|        | 0.14 ± 0.1            | 0.32 ± 0.17           | -0.17 | 0.21 | 0.8  | 0.69 | 0.17               | MAM |
|        | 0.2 ± 0.29            | 0.52 ± 0.32           | -0.32 | 0.38 | 1.07 | 0.76 | 0.06               | JJA |
|        | 0.08 ± 0.08           | 0.2 ± 0.16            | -0.12 | 0.17 | 0.95 | 0.69 | 0.13               | SON |
| MedSea | 0.03 ± 0.06           | 0.06 ± 0.08           | -0.03 | 0.06 | 1.31 | 0.73 | 19.58              | ANN |
|        | 0.01 ± 0.05           | 0.03 ± 0.05           | -0.02 | 0.05 | 1.53 | 0.61 | 2.86               | DJF |
|        | 0.03 ± 0.08           | 0.06 ± 0.09           | -0.03 | 0.07 | 1.37 | 0.73 | 4.74               | MAM |
|        | 0.03 ± 0.06           | 0.07 ± 0.08           | -0.03 | 0.06 | 1.17 | 0.76 | 7.4                | JJA |
|        | 0.02 ± 0.05           | 0.05 ± 0.06           | -0.03 | 0.05 | 1.32 | 0.74 | 4.57               | SON |
| NorAtl | 0.01 ± 0.03           | 0.05 ± 0.06           | -0.04 | 0.05 | 1.57 | 0.71 | 2.57               | ANN |
|        | 0.01 ± 0.02           | 0.04 ± 0.05           | -0.03 | 0.06 | 1.64 | 0.41 | 0.32               | DJF |
|        | 0.01 ± 0.03           | 0.05 ± 0.06           | -0.04 | 0.06 | 1.67 | 0.71 | 0.65               | MAM |
|        | 0.02 ± 0.04           | 0.05 ± 0.07           | -0.03 | 0.06 | 1.48 | 0.78 | 0.97               | JJA |
|        | 0.01 ± 0.02           | 0.04 ± 0.04           | -0.03 | 0.05 | 1.58 | 0.62 | 0.63               | SON |
| NorEur | 0.01 ± 0.02           | 0.04 ± 0.04           | -0.03 | 0.05 | 1.63 | 0.45 | 16.01              | ANN |
|        | 0 ± 0.01              | 0.03 ± 0.05           | -0.02 | 0.05 | 1.72 | 0.22 | 1.32               | DJF |
|        | 0.01 ± 0.03           | 0.04 ± 0.05           | -0.03 | 0.06 | 1.62 | 0.48 | 4.62               | MAM |
|        | 0.01 ± 0.02           | 0.03 ± 0.04           | -0.03 | 0.04 | 1.61 | 0.47 | 6.83               | JJA |
|        | 0 ± 0.02              | 0.03 ± 0.04           | -0.03 | 0.04 | 1.68 | 0.44 | 3.24               | SON |
| Russia | 0.01 ± 0.03           | 0.04 ± 0.05           | -0.03 | 0.06 | 1.52 | 0.35 | 1.26               | ANN |
|        | 0.01 ± 0.02           | 0.04 ± 0.05           | -0.03 | 0.06 | 1.51 | 0.45 | 0.06               | DJF |
|        | 0.01 ± 0.03           | 0.05 ± 0.06           | -0.04 | 0.07 | 1.52 | 0.47 | 0.38               | MAM |
|        | 0.01 ± 0.03           | 0.04 ± 0.05           | -0.02 | 0.05 | 1.52 | 0.28 | 0.65               | JJA |
|        | 0.01 ± 0.02           | 0.04 ± 0.06           | -0.03 | 0.07 | 1.54 | 0.2  | 0.16               | SON |

Figure S7. Same as in Fig. S1 but for the comparison between the MONARCH reanalysis and AERONET mean regional coarse DOD.



|        | MONARCH<br>COARSE DOD | MIDAS+IASI<br>COARSE DOD | MB    | RMSE | FGE  | CC   | N x10 <sup>7</sup> |     |
|--------|-----------------------|--------------------------|-------|------|------|------|--------------------|-----|
| NorAfr | 0.25 ± 0.23           | 0.18 ± 0.18              | 0.06  | 0.14 | 0.5  | 0.83 | 19.94              | ANN |
|        | 0.19 ± 0.21           | 0.13 ± 0.16              | 0.06  | 0.13 | 0.56 | 0.84 | 5.16               | DJF |
|        | 0.29 ± 0.29           | 0.23 ± 0.22              | 0.06  | 0.17 | 0.48 | 0.83 | 4.85               | MAM |
|        | 0.33 ± 0.22           | 0.23 ± 0.18              | 0.1   | 0.17 | 0.51 | 0.79 | 4.97               | JJA |
|        | 0.19 ± 0.15           | 0.15 ± 0.13              | 0.04  | 0.1  | 0.45 | 0.8  | 4.97               | SON |
| SubSah | 0.17 ± 0.24           | 0.13 ± 0.2               | 0.04  | 0.14 | 0.86 | 0.83 | 4.94               | ANN |
|        | 0.16 ± 0.23           | 0.12 ± 0.19              | 0.04  | 0.14 | 0.92 | 0.81 | 2.45               | DJF |
|        | 0.25 ± 0.34           | 0.2 ± 0.27               | 0.05  | 0.18 | 0.79 | 0.86 | 1.06               | MAM |
|        | 0.15 ± 0.16           | 0.14 ± 0.16              | 0.01  | 0.13 | 0.73 | 0.67 | 0.44               | JJA |
|        | 0.1 ± 0.1             | 0.07 ± 0.1               | 0.03  | 0.09 | 0.88 | 0.58 | 0.99               | SON |
| MidEas | 0.2 ± 0.19            | 0.17 ± 0.17              | 0.02  | 0.12 | 0.46 | 0.78 | 11.29              | ANN |
|        | 0.13 ± 0.13           | 0.11 ± 0.11              | 0.02  | 0.08 | 0.46 | 0.8  | 2.77               | DJF |
|        | 0.24 ± 0.22           | 0.23 ± 0.2               | 0.02  | 0.14 | 0.43 | 0.79 | 2.55               | MAM |
|        | 0.28 ± 0.23           | 0.23 ± 0.2               | 0.05  | 0.17 | 0.51 | 0.72 | 2.95               | JJA |
|        | 0.14 ± 0.11           | 0.13 ± 0.1               | 0.01  | 0.08 | 0.43 | 0.73 | 3.01               | SON |
| WesAsi | 0.1 ± 0.12            | 0.1 ± 0.11               | 0     | 0.1  | 0.89 | 0.65 | 7.9                | ANN |
|        | 0.06 ± 0.08           | 0.06 ± 0.07              | 0     | 0.06 | 0.7  | 0.67 | 1.01               | DJF |
|        | 0.11 ± 0.12           | 0.12 ± 0.12              | -0.01 | 0.1  | 0.98 | 0.64 | 1.63               | MAM |
|        | 0.13 ± 0.14           | 0.13 ± 0.13              | 0     | 0.12 | 0.83 | 0.62 | 2.8                | JJA |
|        | 0.08 ± 0.09           | 0.08 ± 0.08              | 0     | 0.07 | 0.99 | 0.63 | 2.46               | SON |
| TroAtl | 0.12 ± 0.17           | 0.13 ± 0.18              | -0.01 | 0.11 | 0.99 | 0.79 | 4.52               | ANN |
|        | 0.13 ± 0.16           | 0.12 ± 0.17              | 0     | 0.12 | 0.97 | 0.74 | 1.36               | DJF |
|        | 0.13 ± 0.19           | 0.15 ± 0.2               | -0.02 | 0.12 | 1.01 | 0.82 | 1.11               | MAM |
|        | 0.14 ± 0.19           | 0.15 ± 0.2               | -0.01 | 0.13 | 0.93 | 0.8  | 1.04               | JJA |
|        | 0.07 ± 0.11           | 0.08 ± 0.12              | -0.01 | 0.08 | 1.06 | 0.78 | 1                  | SON |
| AraSea | 0.07 ± 0.1            | 0.08 ± 0.11              | -0.02 | 0.07 | 0.74 | 0.78 | 3.7                | ANN |
|        | 0.04 ± 0.05           | 0.04 ± 0.05              | -0.01 | 0.04 | 0.81 | 0.71 | 1.15               | DJF |
|        | 0.07 ± 0.09           | 0.1 ± 0.11               | -0.03 | 0.08 | 0.81 | 0.75 | 1.09               | MAM |
|        | 0.16 ± 0.16           | 0.18 ± 0.18              | -0.02 | 0.13 | 0.52 | 0.74 | 0.57               | JJA |
|        | 0.04 ± 0.05           | 0.06 ± 0.06              | -0.02 | 0.04 | 0.7  | 0.76 | 0.89               | SON |
| MedSea | 0.05 ± 0.1            | 0.05 ± 0.09              | 0.01  | 0.07 | 1.23 | 0.73 | 5.65               | ANN |
|        | 0.04 ± 0.1            | 0.03 ± 0.1               | 0.01  | 0.07 | 1.31 | 0.74 | 1.02               | DJF |
|        | 0.07 ± 0.13           | 0.07 ± 0.13              | 0     | 0.09 | 1.23 | 0.74 | 1.24               | MAM |
|        | 0.05 ± 0.09           | 0.05 ± 0.07              | 0.01  | 0.06 | 1.03 | 0.72 | 1.93               | JJA |
|        | 0.04 ± 0.07           | 0.04 ± 0.06              | 0.01  | 0.05 | 1.46 | 0.73 | 1.46               | SON |
| NorAtl | 0 ± 0.02              | 0.01 ± 0.03              | -0.01 | 0.02 | 1.9  | 0.67 | 4.97               | ANN |
|        | 0 ± 0.02              | 0.01 ± 0.03              | 0     | 0.02 | 1.84 | 0.66 | 0.85               | DJF |
|        | 0 ± 0.02              | 0.02 ± 0.03              | -0.02 | 0.03 | 1.87 | 0.71 | 1.43               | MAM |
|        | 0.01 ± 0.03           | 0.01 ± 0.04              | -0.01 | 0.03 | 1.91 | 0.7  | 1.37               | JJA |
|        | 0 ± 0.01              | 0.01 ± 0.02              | -0.01 | 0.02 | 1.94 | 0.61 | 1.32               | SON |
| NorEur | 0.01 ± 0.03           | 0.02 ± 0.03              | -0.01 | 0.03 | 2.12 | 0.52 | 3.37               | ANN |
|        | 0 ± 0.01              | 0.01 ± 0.03              | -0.01 | 0.03 | 1.87 | 0.25 | 0.15               | DJF |
|        | 0.01 ± 0.03           | 0.02 ± 0.03              | -0.01 | 0.03 | 2.3  | 0.54 | 1.1                | MAM |
|        | 0.01 ± 0.03           | 0.02 ± 0.02              | -0.01 | 0.03 | 1.76 | 0.57 | 1.38               | JJA |
|        | 0.01 ± 0.02           | 0.01 ± 0.02              | 0     | 0.02 | 2.55 | 0.46 | 0.73               | SON |
| Russia | 0.02 ± 0.04           | 0.02 ± 0.03              | 0     | 0.04 | 2.51 | 0.37 | 2.14               | ANN |
|        | 0 ± 0.01              | 0.13 ± 0.06              | -0.13 | 0.14 | 1.92 | 0.06 | 0.01               | DJF |
|        | 0.02 ± 0.05           | 0.03 ± 0.04              | 0     | 0.04 | 3.07 | 0.5  | 0.56               | MAM |
|        | 0.02 ± 0.04           | 0.02 ± 0.02              | 0     | 0.04 | 2.3  | 0.36 | 1.22               | JJA |
|        | 0.02 ± 0.04           | 0.01 ± 0.02              | 0.01  | 0.04 | 2.35 | 0.36 | 0.36               | SON |

Figure S8. Same as in Fig. S1 but for the comparison between the MONARCH reanalysis and MIDAS+IASI mean regional coarse DOD.
